1 Ecotone formation through ecological niche construction: the role of  
2 biodiversity and species interactions

3 Kevin Liautaud\*, Matthieu Barbier, Michel Loreau

4 *Centre for Biodiversity Theory and Modelling, Theoretical and Experimental Ecology Station, UMR*  
5 *5321, CNRS and Paul Sabatier University, 09200 Moulis, France*

6 *\*Correspondence : kevin.liautaud@gmail.com, ORCID : <https://orcid.org/0000-0001-6164-8415>*

7 **Abstract**

8 Rapid changes in species composition, also known as ecotones, can result from various  
9 causes including rapid changes in environmental conditions, or physiological thresholds. The  
10 possibility that ecotones arise from ecological niche construction by ecosystem engineers has  
11 received little attention. In this study, we investigate how the diversity of ecosystem engi-  
12 neers, and their interactions, can give rise to ecotones. We build a spatially explicit dynamical  
13 model that couples a multispecies community and its abiotic environment. We use numerical  
14 simulations and analytical techniques to determine the biotic and abiotic conditions under  
15 which ecotone emergence is expected to occur, and the role of biodiversity therein. We show  
16 that the diversity of ecosystem engineers can lead to indirect interactions through the modi-  
17 fication of their shared environment. These interactions, which can be either competitive or  
18 mutualistic, can lead to the emergence of discrete communities in space, separated by sharp  
19 ecotones where a high species turnover is observed. Considering biodiversity is thus critical  
20 when studying the influence of species-environment interactions on the emergence of ecotones.  
21 This is especially true for the wide range of species that have small to moderate effects on  
22 their environment. Our work highlights new mechanisms by which biodiversity loss could  
23 cause significant changes in spatial community patterns in changing environments.

24 **Keywords:** Biodiversity, Community patterns, Ecological niche construction, Ecosystem en-  
25 gineers, Ecotones, Species interactions

## 26 1 Introduction

27 Whether species composition changes gradually, or forms discrete zones along environmental gra-  
28 dients has been the subject of a long-standing debate in ecology (Clements, 1916; Gleason, 1926;  
29 Braun-Blanquet, 1928; Hedberg, 1955; McIntosh, 1967). Observational studies have found both  
30 gradual (Whittaker, 1956; Vazquez G. and Givnish, 1998; Ellison et al., 2010; Lieberman et al.,  
31 1996) and discrete patterns (Kitayama, 1992; Hemp, 2006; Tuomisto and Ruokolainen, 1994;  
32 Kessler, 2000). Rapid changes in community composition along gradients, also termed ecotones  
33 (Kent et al., 1997), have been observed in a wide range of ecosystems, such as alpine treelines  
34 (Germino et al., 2002), tropical mountain forests (Martin et al., 2007) and coastal environments  
35 (Sternberg et al., 2007; Walker et al., 2003). Hereafter, a transition will be termed "rapid" when  
36 its scale is much smaller than the spatial scale of the landscape, even though the transitional area  
37 may show mixing of species.

38 While rapid changes can be blurred by species dispersal (Liataud et al., 2019) or stochasticity  
39 in nature, it is important to understand the theoretical conditions under which rapid community  
40 changes can emerge. These rapid changes in species composition can coincide with rapid changes  
41 in environmental conditions, such as the frost line (Kitayama and Mueller-Dombois, 1992) or  
42 discontinuities in edaphic conditions (Tuomisto and Ruokolainen, 1994; Kessler, 2000). In these  
43 cases, it is often assumed that changes in abiotic conditions are responsible for the change in species  
44 composition (McIntosh, 1967; Kent et al., 1997). This assumption is supported in many cases, but  
45 it may obscure the possibility that, in other settings, the two boundaries emerge together from the  
46 influence of species on their abiotic environment. The mechanisms that can lead to such transitions  
47 are poorly known, and in particular the respective contributions of species-environment feedbacks  
48 and interspecific interactions.

49 Species that are able to modify their abiotic environment are often called "ecosystem engineers"  
50 (Jones et al., 2010). Classical examples range from beavers that impact water flow and habitat  
51 heterogeneity (Wright et al., 2002), to cushion alpine plants that buffer extreme temperatures  
52 and increase soil moisture (Badano et al., 2006). Ecological niche construction is a particular  
53 case in which engineers modify the environment to their own benefits (Kylafis and Loreau, 2008,  
54 2011), creating a feedback with the environment (an example in which engineers can instead create  
55 succession is presented in the Appendix). This ecological process should be distinguished from

56 the related concept of niche construction in evolutionary theory in which we would also expect  
57 species traits to evolve over time (Odling-Smee et al., 2003, 1996). Examples of ecological niche  
58 construction range from plant-water feedbacks in arid environment (Dekker et al., 2007) to increases  
59 in nutrient inputs by trees in tropical ecosystems (De longe et al., 2008). Such feedbacks can govern  
60 species distributions (Wilson and Agnew, 1992), particularly under harsh environmental conditions  
61 (Kéfi et al., 2007; Gilad et al., 2004; Meron et al., 2004; von Hardenberg et al., 2001), and lead  
62 to the emergence of ecotones (Bearup and Blasius, 2017; Jiang and DeAngelis, 2013). Classical  
63 studies on ecosystem engineers, however, have generally focused on the effects of a particular  
64 species having strong effects on the abiotic environment (Jones et al., 2010; Bouma et al., 2010;  
65 Prugh and Brashares, 2012). But many more species have small or moderate impacts on their  
66 environment. Such species, which are often neglected individually, might substantially affect their  
67 environment when aggregated. Furthermore, previous studies have scarcely explored what types  
68 of interactions can arise between multiple species that engineer their shared environment. We  
69 thus propose to focus on the role of diversity and species interactions in the emergence of ecotones  
70 through ecological niche construction.

71 Biodiversity can have two main effects on the emergence of species-environment feedbacks : a  
72 cumulative effect of species number, and a heterogeneity effect due to variations in species' pref-  
73 erences and engineering ability. Cumulative effects are similar to complementarity in biodiversity-  
74 ecosystem functioning relationships (Loreau and Hector, 2001; Hooper et al.). The fact that species  
75 coexist with weak or no competition implies the existence of different niches, i.e. other factors be-  
76 yond the environmental preference modelled here. This cumulative effect arises when there is  
77 no single identifiable engineer, but where community acts collectively to create an ecotone. A  
78 potential example is the occurrence of ecotones between mangroves and hardwood forests, where  
79 several mangrove tree species can modify water salinity in synergy (Sternberg et al., 2007). In  
80 contrast, the heterogeneity effect of biodiversity arises when there are differences in species' pre-  
81 ferred environmental states. We investigate the effect of these differences on emergent competition  
82 or facilitation between ecosystem engineers, and how this could play a role in ecotone emergence.

83 In this study, we build a theoretical model that couples the dynamics of a community and  
84 of its abiotic environment to assess the role of ecosystem engineers and of their diversity in the  
85 emergence of ecotones in space. In our model, ecotones are represented by abrupt changes, in-

cluding discontinuities. In the presence of multiple interacting species, we show that ecological niche construction can lead to the emergence of indirect interspecific interactions -which can be either positive or negative - through environmental modifications. Similarly, we show that even species with different preferences can act synergistically as a single community. We then assess the consequences of these different interaction types for community patterns in space, and identify the conditions under which ecotone formation is predicted to occur.

## 2 Model and methods

### 2.1 Species growth and niche construction

We model the dynamics of a community of  $n$  species, each of which obeys a logistic growth along a gradient of an arbitrary environmental factor  $E$ . We consider independent locations along this environmental gradient, assuming no fluxes between the locations <sup>1</sup>. For a given location  $k$ , the population dynamics of species  $i$  is given by:

$$\frac{dN_{i,k}}{dt} = r_i N_{i,k} \left( 1 - \frac{N_{i,k}}{K_i(E_k)} \right) \quad (1)$$

where  $E_k$  represents the value of the environmental factor at location  $k$ ,  $N_{i,k}$  is the abundance of species  $i$  at that location, and  $r_i$  is its intrinsic growth rate, assumed to be equal for all species,  $r_i = r$ . The fundamental niche of each species is defined by its carrying capacity  $K_i(E)$ , which is assumed to depend on the environmental value  $E$  according to a Gaussian function:

$$K_i(E) = K_i^{\max} \exp \left[ -\frac{(E - C_i)^2}{2T_i^2} \right] \quad (2)$$

The classical Hutchinsonian niche (Hutchinson, 1957) would instead be defined in terms of growth rate, but these two assumptions are equivalent in the case of logistic growth as considered here. The above function is characterized by the species' fundamental niche centre  $C_i$ , i.e. the value of the environmental factor for which its carrying capacity reaches its maximum value  $K_i^{\max}$ , and its tolerance range  $T_i$ . This unimodal, continuous distribution ensures a gradual response of each species to changes in the environment.

---

<sup>1</sup>But see Liautaud et al. (2019) for the role of dispersal in smoothing abrupt transitions.

108 At each location  $k$  on the gradient, the environmental factor has a distinct physical baseline  
109 value  $B_k$  representing its state in the absence of environment modification. Species, however, can  
110 affect the environmental value  $E_k$  by pushing it toward their preferred value  $C_i$  at a maximum rate  
111  $m_i$ , which we call the niche construction rate. These species will be called "ecosystem engineers".  
112 The environment tends to return spontaneously to its baseline value  $B_k$  at a rate  $\mu$ . The dynamics  
113 of the environmental factor at location  $k$  is therefore:

$$\frac{dE_k}{dt} = \mu(B_k - E_k) + \sum_i m_i \frac{N_{i,k}}{K_i^{\max}} (C_i - E_k) \quad (3)$$

114 where abundance  $N_{i,k}$  is rescaled by its maximum  $K_i^{\max}$  so that  $m_i$  is the maximum rate at which  
115 species  $i$  can affect the environment. In this study, we assume that species' carrying capacities  
116 are only influenced by a single factor  $E$ , although we recognize that many abiotic factors can also  
117 affect  $K$  in nature. The presence of direct competition between species can also have an influence  
118 on species distributions in space (Liautaud et al., 2019), we describe this case in Appendix A3. In  
119 this simplified model, the only role played by growth rates is to determine how fast species reach  
120 their carrying capacities, and which equilibrium is reached from given initial conditions when there  
121 are multiple equilibria. The identification of alternative equilibria is described in the next section.

## 122 2.2 Potential landscape and alternative equilibria

123 To predict the long-term spatial patterns created by dynamics (1) and (3), we propose a simple  
124 method for finding their equilibria at each location  $k$  along the gradient. This method is based on  
125 the notion of potential landscape, whose role in ecology was pioneered by Holling (1973).

126 Let us consider a local community at a given location  $k$  with baseline environmental state  $B_k$ .  
127 If species population dynamics are much faster than that of the environment ( $r \gg \max(m_i, \mu)$ )  
128 we expect that species quickly reach their carrying capacity for a given environment value,  $N_{i,k} =$   
129  $K_i(E_k)$ , while  $E_k$  changes over longer time scales according to :

$$\frac{dE_k}{dt} = \mu(B_k - E_k) + \sum_i m_i \frac{K_i(E_k)}{K_i^{\max}} (C_i - E_k) \quad (4)$$

130 We show in the Appendix A2.1 that this can be expressed as a gradient descent dynamics,

$$\frac{dE_k}{dt} = -\frac{d}{dE_k}U(E_k) \quad (5)$$

131 where  $U(E_k)$  is a potential function. This equation imposes that, from any initial condition,  
132 the variable  $E_k(t)$  always moves over time toward the closest minimum of  $U(E)$ , and then stays  
133 there at equilibrium. This potential takes the form:

$$U(E_k) = U_E(E_k) + U_{sp}(E_k) \quad (6)$$

134 where  $U_E(E_k)$  represents the contribution of abiotic processes returning the environment to its  
135 baseline state, with

$$U_E(E_k) = \frac{\mu}{2}(E_k - B_k)^2 \quad (7)$$

136 and  $U_{sp}(E_k)$  represents the species' contribution

$$U_{sp}(E_k) = -\sum_i m_i T_i^2 \exp\left[-\frac{(E_k - C_i)^2}{2T_i^2}\right] \quad (8)$$

137 which we illustrate in Fig.1 for a single species. The relative effect of abiotic and biotic factors  
138 in encapsulated in the ratio :

$$\gamma_i = \frac{m_i}{\mu} \quad (9)$$

139 such that niche construction is weak for  $\gamma \ll 1$  and strong for  $\gamma \gg 1$ . This parameter will be  
140 termed "niche construction strength".

141 This potential landscape provides an intuitive interpretation of the action of engineer species.  
142 In the absence of niche construction ( $m_i = 0$ ), the only minimum of  $U(E_k)$  is at the physical  
143 baseline  $E_k = B_k$ . When present, ecosystem engineers "dig" in that landscape, creating wells of  
144 width  $T_i$  centered on their preferred value  $C_i$ . As we see in Fig.1, weak engineering only slightly

145 displaces the equilibrium, while strong engineering can create an alternative equilibrium, or even  
146 overcome abiotic dynamics entirely.

147 We also show in the Appendix A2.1 that, for arbitrary values of the rates  $r$ ,  $m_i$  and  $\mu$ , the  
148 dynamics of  $E_k(t)$  become more complex than a gradient descent (i.e. the function  $U(E_k)$  can  
149 increase for part of the time), but all possible equilibria are still given by the minima of the  
150 potential  $U(E_k)$  defined in (6).

## 151 2.3 Numerical simulations

152 In the presence of a single ecosystem engineer, the niche construction strength ( $\gamma$ ) is expected to  
153 be the main driver of the dynamics. We thus study the influence of this parameter on the shape  
154 of potential landscape, and the consequences for species' distribution in space.

155 In diverse communities, the similarity of species in their resource use or environmental require-  
156 ments has been shown to influence species interactions (Abrams, 1983; MacArthur and Levins,  
157 1967; Levin, 1970), and species distribution in space (MacArthur, 1972). Therefore, we study how  
158 the difference in the environment optimum of the various species ( $\Delta C$ ) and the niche construction  
159 strength ( $\gamma$ ), can influence the nature and intensity of species interactions ( $I$ ) in a two-species  
160 system. To do this, we compute the abundance of a species 1 when alone ( $N_{1a}$ ), or in the presence  
161 of a second species 2 ( $N_{1b}$ ), for different values of ( $\gamma$ ,  $\Delta C$ ). We use the relative change in the  
162 abundance of species 1 as a measure of the net effect of species 2 on species 1 :

$$I_{12} = \frac{N_{1b} - N_{1a}}{N_{1a}} \quad (10)$$

163 In our study, the two species have equal niche construction abilities, but distinct environment  
164 optima. In the case where bistability is observed, we only study the equilibrium for which species  
165 1 predominates ( $C_1 = 40$ ,  $C_2 = C_1 + \Delta C$ ,  $E_{t=0} = B = 50$ ). We then extend these results to a  
166 larger number ( $S$ ) of engineer species.

167 To address the role of these different factors - ( $\gamma, \Delta C, S$ ) - on community pattern in diverse  
168 communities, we study an environmental gradient of 101 cells ranging from  $k = 100$  to  $k = 200$  in  
169 arbitrary units, with a step size of 1. The baseline value of the environment gradually increases  
170 along the gradient, as  $B_k = k$ . The centres of the fundamental niches of the various species,  $C_i$ ,

171 are randomly assigned following a uniform distribution between 0 and 300, so that species may  
172 have their niche centre in or outside the studied zone initially.

173 The model is run independently on each cell. The initial value of the environment at each  
174 location equals its baseline value ( $E_k(t = 0) = B_k$ ). For all simulation results in the main text,  
175 species were given equal maximal carrying capacity  $K^{\max} = 1$  and tolerance range  $T \leq 10$ .  
176 Environmental return rate is set to  $\mu = 1$ , and species intrinsic growth rate is set to  $r = 10$ . Under  
177 these conditions, with  $r \gg \mu$ , species quickly reach their carrying capacity, with  $N_{i,k} = K_{i,k}(E)$   
178 (see 2.2). Initial species abundances are set equal for all species in all locations. We run the model  
179 with different values of the different parameters of interest ( $\gamma$ ,  $\Delta C$ ,  $S$ ) until  $t = 1000$ , and verify  
180 that the equilibrium is reached.

## 181 **3 Results**

### 182 **3.1 Effects of niche construction strength on local equilibria**

183 In the case where niche construction is weak ( $\gamma = 0.1$ , Fig. 1), the dynamics goes towards the  
184 environmental baseline value  $B$ . However, when the niche construction strength of a species in-  
185 creases ( $\gamma = 5$ ), it becomes able to influence the environment. With increasing niche construction,  
186 the species becomes able to create an alternative stable equilibrium, which corresponds to an envi-  
187 ronment value close to its optimum ( $\gamma = 10$ ). For a very high niche construction ability ( $\gamma = 100$ ),  
188 the species environment optimum becomes the single stable equilibrium in the system.

189

### 190 **3.2 Engineer similarity, attractors and species interactions**

191 Here we study the influence of the difference in engineers' environment optima ( $\Delta C$ ) on the po-  
192 tential landscape. For 2 species with a high niche construction rate ( $\gamma \rightarrow +\infty$ , Fig. 2, a)  $\Delta C$   
193 determines the number of attractors in the system. We can calculate a threshold  $\theta$  of  $\Delta C$  that  
194 separates cases in which species' contributions to the potential ( $U_{sp}$ , Eq 6) create a single attrac-  
195 tor, from cases where two attractors are observed. When  $\Delta C > \theta$ , there are two minima in  $U_{sp}$ .  
196 As we have assumed that the abiotic contribution  $U_E(E)$  is negligible, the species create distinct  
197 minima in the potential  $U(E)$  (red curve) that correspond to distinct attractors (i.e alternative



198 stable states), in which the environment is optimal for either of the two species (Fig. 2, a, I). By  
199 contrast, when  $\Delta C < \theta$ , there is a single minimum in  $U_{sp}$ . In this case, the two species create a  
200 common well in the potential landscape, which corresponds to a single equilibrium in between the  
201 two species' optima (Fig. 2, a, II). We show in the Appendix A2.2 that  $\theta = 2T$  for species with  
202 equal tolerance ranges  $T$  and maximal carrying capacities  $K_{max}$ .

203 The similarity ( $\Delta C$ ) of engineers therefore influences the nature and intensity of species net  
204 interactions. When niche construction is weak and the similarity in environmental optima is high,  
205 the abundance of species 1 is increased when associated with species 2 (Fig. 3, red). The relative  
206 increase in species 1's abundance in association with species 2 can reach 8% when compared with  
207 its abundance when alone, indicating a positive net interaction between the two species ( $I > 0$ ).  
208 By contrast, when niche construction is high and dissimilarity in environment optima is high,  
209 species 1 has a lower abundance in the presence of species 2 (Fig. 3, blue, indicating a negative net  
210 interaction ( $I < 0$ )). The relative decrease in the abundance of species 1 in the presence of species  
211 2 can reach more than 30%, and is maximal for  $\Delta C \approx \theta$ . For a given niche construction rate  
212  $\gamma$ , indirect interactions can thus be alternatively positive or negative, depending on the species'  
213 similarity  $\Delta C$ .

214 The diversity of ecosystem engineers also has an influence on system properties. In the case  
215 where species have weak niche construction abilities ( $\gamma = 1$ , Fig. 2, b), a single species is unable  
216 to create a well in the potential. Instead, the environment controls the dynamics and the only  
217 equilibrium corresponds to the environment baseline  $B$ . By contrast, when several weak engineer  
218 species with close optima are present, they are able to dig a common well in the potential landscape  
219 (Fig. 2, b, II). This leads to the emergence of an alternative stable equilibrium, in which the  
220 environment lies between the various species' optima.

### 221 **3.3 Influence of engineer similarity on species distribution and environ-** 222 **mental changes in space**

223 As described in section 3.2, the similarity of species environment optima ( $\Delta C$ ) influences the  
224 number of stable equilibria. When two ecosystem engineers are present along an environmental  
225 gradient, different community patterns can emerge, depending on  $\Delta C$ . In the case where  $\Delta C > \theta$   
226 (Fig. 4, I), each species pushes the environment to its own optimum. Along an environmental

227 gradient, this leads to the emergence of distinct zones where the environment is driven close to the  
228 respective species optima. These zones are separated by abrupt changes in both the environment  
229 (Fig. 4,I,b) and species abundances (Fig. 4,I,c). Within these zones, each species is dominant in  
230 the spatial extent over which it controls the environment (Fig. 4,II). A distinct pattern emerges  
231 in the case where  $\Delta C < \theta$ , with the two species pushing the environment between their respective  
232 optima. This leads to the emergence of a single spatial zone where the environment is modified,  
233 and allows species coexistence at high abundances (Fig. 4, II, b-c). The transition between zones  
234 where the species can or cannot modify the environment is abrupt, with a discontinuity in both  
235 the environment and species abundances.

### 236 **3.4 Spatial community patterns in diverse communities**

237 We now extend these results to many-species communities. In the case where several strong  
238 ecosystem engineers are present ( $\gamma_i = 10$ ), we observe discrete communities in space, separated by  
239 sharp boundaries where important changes in both the abundance of ecosystem engineers (blue  
240 curves, Fig. 5, I) and in the environment (Fig. 5, I, b) occur. Non-engineers species ( $\gamma_i = 0$ , black  
241 curves) follow this pattern, with abrupt changes in their abundances. The bifurcation diagram  
242 shows the existence of alternative stable states, with different environment equilibria for a given  
243 location in space (Fig. 5, I, b). Similar patterns are observed when there are numerous weak  
244 ecosystem engineers ( $\gamma = 2$ ), with the coincidence of abrupt changes in both the environment  
245 and species abundances in space. We observe much fewer discrete zones than there are engineers,  
246 because of the fusion of their potential wells (see section 3.2).

## 247 **4 Discussion**

248 In this work, we investigated the role of biodiversity and species interactions in the emergence  
249 of ecotones through ecological niche construction. In particular, we studied the respective contri-  
250 butions of niche construction strength ( $\gamma$ ), similarity in the environment optimum of the species  
251 ( $\Delta C$ ) and diversity ( $S$ ). Our results show that, depending on the engineering strength  $\gamma$ , the  
252 contribution of biodiversity to ecotone emergence will be either through the similarity of species'  
253 environmental optima  $\Delta C$ , or through the diversity of engineering species  $S$ .

254 In the case of a single ecosystem engineer acting on the environment, discontinuities occur  
255 when a high niche construction rate ( $\gamma$ ) allows the engineer to control its environment. These  
256 abrupt shifts are explained by the presence of two alternative stable states in the system that  
257 correspond to: 1) a modified state, with the environment close to the engineer's optimum, and 2)  
258 a non-modified state, corresponding to the baseline value of the environment. A small change in  
259 the environmental conditions can thus lead to an abrupt shift from one attractor to the other.

260 In the case where species are strong ecosystem engineers, the difference in environmental optima  
261 ( $\Delta C$ ) is the main contribution of biodiversity to the emergence of ecotones. The presence of  
262 various engineers with distinct environment optima leads to the emergence of indirect interactions  
263 that influence the community patterns. We showed in a two-species system that these indirect  
264 interactions can be competitive or mutualistic, depending on the value of the difference  $\Delta C$ .

265 When engineers have distant environmental optima and strong engineering abilities, their net  
266 interaction is competitive. At a given location, a species has a lower abundance when associated to  
267 a second engineer, as compared with its abundance when alone. Indirect competition through the  
268 environment can be observed in cases where there is multistability in the system, but also when  
269 a single equilibrium exists. In the extreme case where the modified environmental conditions are  
270 outside the other species' fundamental niche, the latter can be excluded. By contrast, when the  
271 species' environmental optima are close, with weak engineering abilities, we observe the emergence  
272 of net mutualistic interactions. In these cases, the two species are able to improve their carrying  
273 capacities, by modifying the environment to their mutual benefit. The abundance of a species  
274 is thus higher when associated with another engineer. In our study, the more species differ in  
275 their environmental optima, the stronger the negative effect they have on each other. This differs  
276 from classical limiting similarity theory (Abrams, 1983; MacArthur and Levins, 1967). Consid-  
277 ering limiting resources such as water or light, limiting similarity theory predicts an increase in  
278 competition strength as the similarity in the resource requirements of the various species increases.  
279 By contrast, when species modify the abiotic environment to their own benefit, we showed that  
280 competition decreases, and then can turn into a net mutualistic interaction as the similarity of  
281 species' environmental optima increases.

282 With more than two strong engineers along the gradient, engineers with close optima will tend  
283 to modify the environment to their collective benefit. When the ability of a community to modify

284 the environment becomes higher than the ability of another one, the former will replace the latter  
285 along environmental gradients. This can be interpreted as a situation where there is competition  
286 between communities. In this case, the community shows a high level of integration (Clements,  
287 1916; Wilson and Sober, 1989). This type of community organization tends to create particular  
288 species abundance patterns in space, with discrete communities separated by sharp boundaries.

289 In the case where the species are weak ecosystem engineers, the main contribution of biodiversity  
290 to community organization is through the number of engineering species. In this case, a weak  
291 ecosystem engineer alone is not able to substantially modify the environment and create a species-  
292 environment feedback. But when numerous weak engineers with similar optima are present, we do  
293 observe the emergence of species-environment feedbacks. In these cases, species jointly modify the  
294 environment to their collective benefit, as described above. In our model, an increase in species  
295 diversity can lead to an increase in each species' biomass, through facilitation. The collective  
296 action of a large number of different ecosystem engineers can thus lead to the emergence of discrete  
297 communities along an environmental gradient, associated with sharp changes in the environment.  
298 In this study, the effect of several weak ecosystem engineers on the environment is not qualitatively  
299 different from the effect of a single strong engineer, but the spatial extent of the environmental  
300 change may be larger. The existence of several species may indeed broaden the spectrum of abiotic  
301 conditions under which the environment is modified, as seen in the case of positive interactions  
302 between two engineers. Biodiversity is potentially a key factor influencing the emergence of species-  
303 environment feedbacks in nature, and thus the emergence of sharp ecotones separating discrete  
304 communities. This might be the case in mangrove ecosystems, where several species can have  
305 similar effect on water salinity (Sternberg et al., 2007). As shown in this study, a certain level of  
306 biodiversity in ecosystem engineers might be necessary to maintain species-environment feedbacks.  
307 Likewise, Gonzalez et al. (2008) showed that the accumulation of small environmental changes by  
308 weak engineers can ultimately lead to a substantial change in the abiotic environment, and thus  
309 allow an ecosystem engineer to invade. A decrease in biodiversity, as currently observed worldwide  
310 (Pimm et al., 2014; Ceballos et al., 2015), might thus have important consequences, not only for  
311 community composition and organization, but also for the abiotic environment and for ecosystem  
312 functioning.

313 Species that do not modify their environment can also be influenced by ecological niche con-

314 struction. By changing the environment, ecosystem engineers can promote species that benefit  
315 more from the modified state than the baseline conditions. In this case, ecosystem engineers in-  
316 directly facilitate other species through environmental modification. Facilitation has been shown  
317 to occur, particularly under harsh environmental conditions, such as in arid ecosystems (Soliveres  
318 and Maestre, 2014; Vega-Álvarez et al., 2018; Armas and Pugnaire, 2005) or in cold environments  
319 (Choler et al., 2001; Callaway et al., 2002). When an engineer facilitates another species, it can be  
320 considered as a “nurse species” (Niering et al., 1963) that modifies the environment and allows the  
321 growth of species that would not have the ability to grow otherwise. Nevertheless, ecosystem engi-  
322 neering can also have negative effects on other species. For example, van Breemen (1995) showed  
323 how *Sphagnum* species can depress the growth of vascular plants by changing the environmental  
324 conditions in peat bogs ecosystems. A sharp ecotone can thus be explained by the appearance  
325 or disappearance of an engineer along the gradient, facilitating or preventing the growth of other  
326 species. In the case where species do not modify the environment to their own optimum, succession  
327 in time can be observed. In this case, the engineer can foster the growth of its successors, thus  
328 having a negative impact on its own performances (Appendix A4).

329 Species interactions - such as competition or mutualism - have been identified as drivers of  
330 species abundance along environmental gradients (Terborgh and Weske, 1975; Choler et al., 2001).  
331 We have shown in this paper that interactions between species and the abiotic environment can  
332 have unexpected consequences on species interactions themselves. These interactions can lead to  
333 the emergence of discontinuities in the environment, associated with sharp ecotones where impor-  
334 tant species turnover are observed . Explicit consideration of species-environment feedbacks is thus  
335 likely to increase our understanding of species distributions along environmental gradients. It may  
336 similarly be essential when studying the responses of species or communities to temporal changes  
337 in their environment. Finally, we have also shown that biodiversity can influence community orga-  
338 nization along an environmental gradient. Current biodiversity loss can have major consequences  
339 for species distributions, abiotic environmental conditions, and ecosystem functioning.

340 **Data Accessibility Statement** : Should the manuscript be accepted, the code supporting  
341 the results will be archived in an appropriate public repository and the data DOI will be included  
342 at the end of the article.

343 **Acknowledgements** : We thank Yuval Zelnik for insightful discussions in preparing the  
344 manuscript, and two anonymous referees for their constructive contributions during revisions. This  
345 work was supported by the TULIP (Towards a unified theory of biotic interactions) Laboratory  
346 of Excellence (Project ANR-10-LABX-41), and by the BIOTASES (BIOdiversity, STAbility and  
347 sustainability in Spatial Ecological and social-ecological Systems) Advanced Grant, funded by the  
348 European Research Council under the European Union's Horizon 2020 research and innovation  
349 program (grant agreement No 666971).

## 350 References

- 351 Abrams, P. (1983). The Theory of Limiting Similarity. *Annual Review of Ecology and Systematics*,  
352 14(1):359–376.
- 353 Armas, C. and Pugnaire, F. I. (2005). Plant interactions govern population dynamics in a semi-arid  
354 plant community. pages 978–989.
- 355 Badano, E. I., Jones, C., Cavieres, L. G., and Wright, J. P. (2006). Assessing impacts of ecosystem  
356 engineers on community organization: A general approach illustrated by effects of a high-Andean  
357 cushion plant. *Oikos*, 115(2):369–385.
- 358 Bearup, D. and Blasius, B. (2017). Ecotone formation induced by the effects of tidal flooding: A  
359 conceptual model of the mud flat-coastal wetland ecosystem. *Ecological Complexity*, 32:217–227.
- 360 Bouma, T. J., De Vries, M. B., and Herman, P. M. J. (2010). Comparing ecosystem engineering  
361 efficiency of two plant species with contrasting growth strategies. *Ecology*, 91(9):2696–2704.
- 362 Braun-Blanquet, J. (1928). L'origine et le developpement des flores dans le massif central de France  
363 avec aperçu sur les migrations des flores dans l'Europe sud-occidentale. Cont. and to be cont.  
364 *Ann Soc Linneenne Lyon*, (74):80–97.
- 365 Callaway, R. M., Brooker, R. W., Choler, P., Kikvidze, Z., Lortie, C. J., Michalet, R., Paolini, L.,

- 366 Pugnaire, F. I., Newingham, B., Aschehoug, E. T., Armas, C., Kikodze, D., and Cook, B. J.  
367 (2002). Positive interactions among alpine plants increase with stress. *Nature*, 417(6891):844–8.
- 368 Ceballos, G., Ehrlich, P. R., Barnosky, A. D., Garcia, A., Pringle, R. M., and Palmer, T. M.  
369 (2015). Accelerated modern human-induced species losses: Entering the sixth mass extinction.  
370 *Science Advances*, 1(5):e1400253–e1400253.
- 371 Choler, P., Michalet, R., and Callaway, R. M. (2001). Facilitation and Competition on Gradients  
372 in Alpine Plant Communities. *Ecology*, 82(12):3295–3308.
- 373 Clements, F. E. (1916). *Plant succession; an analysis of the development of vegetation*, volume 45.  
374 Carnegie Institution of Washington, Washington,.
- 375 De longe, M., D’odorico, P., and Lawrence, D. (2008). Feedbacks between phosphorus deposition  
376 and canopy cover: The emergence of multiple stable states in tropical dry forests. *Global Change*  
377 *Biology*, 14(1):154–160.
- 378 Dekker, S. C., Rietkerk, M., and Bierkens, M. F. (2007). Coupling microscale vegetation-soil  
379 water and macroscale vegetation-precipitation feedbacks in semiarid ecosystems. *Global Change*  
380 *Biology*, 13(3):671–678.
- 381 Ellison, A. M., Mukherjee, B. B., and Karim, A. (2010). Testing Patterns of Zonation in Mangroves  
382 : Scale Dependence and Environmental Correlates in the Sundarbans of Bangladesh Published  
383 by : British Ecological Society Stable URL : <http://www.jstor.org/stable/2648341>. *Society*,  
384 88(5):813–824.
- 385 Germino, M. J., Smith, W. K., and Resor, A. C. (2002). Conifer seedling distribution and survival  
386 in an alpine-treeline ecotone. *Plant Ecology*, 162(2):157–168.
- 387 Gilad, E., Von Hardenberg, J., Provenzale, A., Shachak, M., and Meron, E. (2004). Ecosystem  
388 engineers: From pattern formation to habitat creation. *Physical Review Letters*, 93(9):1–4.
- 389 Gleason, H. A. (1926). The Individualistic Concept of the Plant Association. *Bulletin of the Torrey*  
390 *Botanical Club*, 53(1):7.
- 391 Gonzalez, A., Lambert, A., and Ricciardi, A. (2008). When does ecosystem engineering cause  
392 invasion and species replacement? *Oikos*, 117(8):1247–1257.

- 393 Hedberg, O. (1955). Altitudinal zonation of the vegetation on the east african mountains. In  
394 *Proceedings of the Linnean Society of London*, volume 165, pages 134–136. Wiley Online Library.
- 395 Hemp, A. (2006). Continuum or zonation? Altitudinal gradients in the forest vegetation of Mt.  
396 Kilimanjaro. *Plant Ecology*, 184(1):27–42.
- 397 Holling, C. S. (1973). Resilience and stability of ecological systems. *Annual Review of Ecology and*  
398 *Systematics*, 4(1):1–23.
- 399 Hooper, D. U., Chapin III, F. S., Ewel, J. J., Hector, A., Inchausti, P., Lavorel, S., Lawton, J. H.,  
400 Lodge, D. M., Loreau, M., Naeem, S., Schmid, B., Setälä, H., Symstad, A. J., Vandermeer, J.,  
401 and Wardle, D. A. Effects of biodiversity on ecosystem functioning: A consensus of current  
402 knowledge. *Ecological Monographs*, 75(1):3–35.
- 403 Hutchinson, G. E. (1957). Concluding Remarks. *Cold Spring Harbor Symposia on Quantitative*  
404 *Biology*, 22(0):415–427.
- 405 Jiang, J. and DeAngelis, D. L. (2013). Strong species-Environment feedback shapes plant commu-  
406 nity assembly along environmental gradients. *Ecology and Evolution*, 3(12):4119–4128.
- 407 Jones, C. G., Gutiérrez, J. L., Byers, J. E., Crooks, J. A., Lambrinos, J. G., and Talley, T. S.  
408 (2010). A framework for understanding physical ecosystem engineering by organisms. *Oikos*,  
409 119(12):1862–1869.
- 410 Kéfi, S., Rietkerk, M., van Baalen, M., and Loreau, M. (2007). Local facilitation, bistability and  
411 transitions in arid ecosystems. *Theoretical Population Biology*, 71(3):367–379.
- 412 Kent, M., Gill, W. J., Weaver, R. E., and Armitage, R. P. (1997). Landscape and plant community  
413 boundaries in biogeography. *Progress in Physical Geography*, 21(3):315–353.
- 414 Kessler, M. (2000). Altitudinal zonation of Andean cryptogam communities. *Journal of Biogeog-*  
415 *raphy*, 27(2):275–282.
- 416 Kitayama, K. (1992). An altitudinal transect study of the vegetation on Mount Kinabalu, Borneo.  
417 *Vegetatio*, 102(2):149–171.
- 418 Kitayama, K. and Mueller-Dombois, D. (1992). Vegetation of the wet windward slope of Haleakala,  
419 Maui, Hawaii. *Pacific Science*, 46(2):197–220.



- 420 Kylafis, G. and Loreau, M. (2008). Ecological and evolutionary consequences of niche construction  
421 for its agent. *Ecology Letters*, 11(10):1072–1081.
- 422 Kylafis, G. and Loreau, M. (2011). Niche construction in the light of niche theory. *Ecology Letters*,  
423 14(2):82–90.
- 424 Levin, S. A. (1970). Community Equilibria and Stability, and an Extension of the Competitive  
425 Exclusion Principle. *The American Naturalist*, 104(939):413–423.
- 426 Liautaud, K., van Nes, E. H., Barbier, M., Scheffer, M., and Loreau, M. (2019). Superorganisms  
427 or loose collections of species? a unifying theory of community patterns along environmental  
428 gradients. *Ecology Letters*, 0(0).
- 429 Lieberman, D., Lieberman, M., Peralta, R., and Hartshorn, G. S. (1996). Tropical Forest Structure  
430 and Composition on a Large-Scale Altitudinal Gradient in Costa Rica. *The Journal of Ecology*,  
431 84(2):137–152.
- 432 Loreau, M. and Hector, A. (2001). Partitioning selection and complementarity in biodiversity  
433 experiments. *Nature*, 412(6842):72–76.
- 434 MacArthur, R. and Levins, R. (1967). The Limiting Similarity, Convergence, and Divergence of  
435 Coexisting Species. *The American Naturalist*, 101(921):377–385.
- 436 MacArthur, R. H. (1972). *Geographical ecology : patterns in the distribution of species*. Princeton  
437 University Press, Princeton.
- 438 Martin, P. H., Sherman, R. E., and Fahey, T. J. (2007). Tropical montane forest ecotones: Climate  
439 gradients, natural disturbance, and vegetation zonation in the Cordillera Central, Dominican  
440 Republic. *Journal of Biogeography*, 34(10):1792–1806.
- 441 McIntosh, R. P. (1967). The continuum concept of vegetation. *The Botanical Review*, 33(2):130–  
442 187.
- 443 Meron, E., Gilad, E., Von Hardenberg, J., Shachak, M., and Zarmi, Y. (2004). Vegetation patterns  
444 along a rainfall gradient. *Chaos, Solitons and Fractals*, 19(2):367–376.
- 445 Niering, W. A., Whittaker, R. H., and Lowe, C. H. (1963). The Saguaro: A Population in Relation  
446 to Environment. *Science (New York, N.Y.)*, 142(3588):15–23.

- 447 Odling-Smee, F. J., Laland, K. N., and Feldman, M. W. (1996). Niche Construction. *The American*  
448 *Naturalist*, 147(4):641–648.
- 449 Odling-Smee, F. J., Laland, K. N., and Feldman, M. W. (2003). *Niche construction: The neglected*  
450 *process in evolution*, volume 9781400847. Princeton University Press.
- 451 Pimm, S. L., Jenkins, C. N., Abell, R., Brooks, T. M., Gittleman, J. L., Joppa, L. N., Raven,  
452 P. H., Roberts, C. M., and Sexton, J. O. (2014). The biodiversity of species and their rates of  
453 extinction, distribution, and protection. *Science*, 344(6187).
- 454 Prugh, L. R. and Brashares, J. S. (2012). Partitioning the effects of an ecosystem engineer:  
455 Kangaroo rats control community structure via multiple pathways. *Journal of Animal Ecology*,  
456 81(3):667–678.
- 457 Soliveres, S. and Maestre, F. T. (2014). Plant-plant interactions, environmental gradients and  
458 plant diversity: A global synthesis of community-level studies. *Perspectives in Plant Ecology,*  
459 *Evolution and Systematics*, 16(4):154–163.
- 460 Sternberg, L. D. S. L., Teh, S. Y., Ewe, S. M., Miralles-Wilhelm, F., and DeAngelis, D. L. (2007).  
461 Competition between hardwood hammocks and mangroves. *Ecosystems*, 10(4):648–660.
- 462 Terborgh, J. and Weske, J. S. (1975). The Role of Competition in the Distribution of Andean  
463 Birds. *Ecology*, 56(3):562–576.
- 464 Tuomisto, H. and Ruokolainen, K. (1994). Distribution of Pteridophyta and Melastomataceae  
465 along an edaphic gradient in an Amazonian rain forest. *Journal of Vegetation Science*, 5(1):25–  
466 34.
- 467 van Breemen, N. (1995). How Sphagnum bogs down other plants. *Trends in Ecology & Evolution*,  
468 10(7):270–275.
- 469 Vazquez G., J. A. and Givnish, T. J. (1998). Altitudinal gradients in tropical forest composition,  
470 structure, and diversity in the Sierra de Manantlan. *Journal of Ecology*, 86(6):999–1020.
- 471 Vega-Álvarez, J., García-Rodríguez, J. A., and Cayuela, L. (2018). Facilitation beyond species  
472 richness. *Journal of Ecology*, (August):1–13.

- 473 von Hardenberg, J., Meron, E., Shachak, M., and Zarmi, Y. (2001). Diversity of vegetation patterns  
474 and desertification. *Physical Review Letters*, 87(19):198101–1–198101–4.
- 475 Walker, S., Wilson, J. B., Steel, J. B., Rapson, G., Smith, B., King, W. M., and Cottam, Y. H.  
476 (2003). Properties of ecotones: Evidence from five ecotones objectively determined from a coastal  
477 vegetation gradient. *Journal of Vegetation Science*, 14(4):579–590.
- 478 Whittaker, R. H. (1956). Vegetation of the Great Smoky Mountains. *Ecological Monographs*,  
479 26(1):1–80.
- 480 Wilson, D. S. and Sober, E. (1989). Reviving the superorganism. *Journal of Theoretical Biology*,  
481 136(3):337–356.
- 482 Wilson, J. B. and Agnew, A. D. Q. (1992). Positive-feedback Switches in Plant Communities.
- 483 Wright, J. P., Jones, C. G., and Flecker, A. S. (2002). An ecosystem engineer, the beaver, increases  
484 species richness at the landscape scale. *Oecologia*, 132(1):96–101.

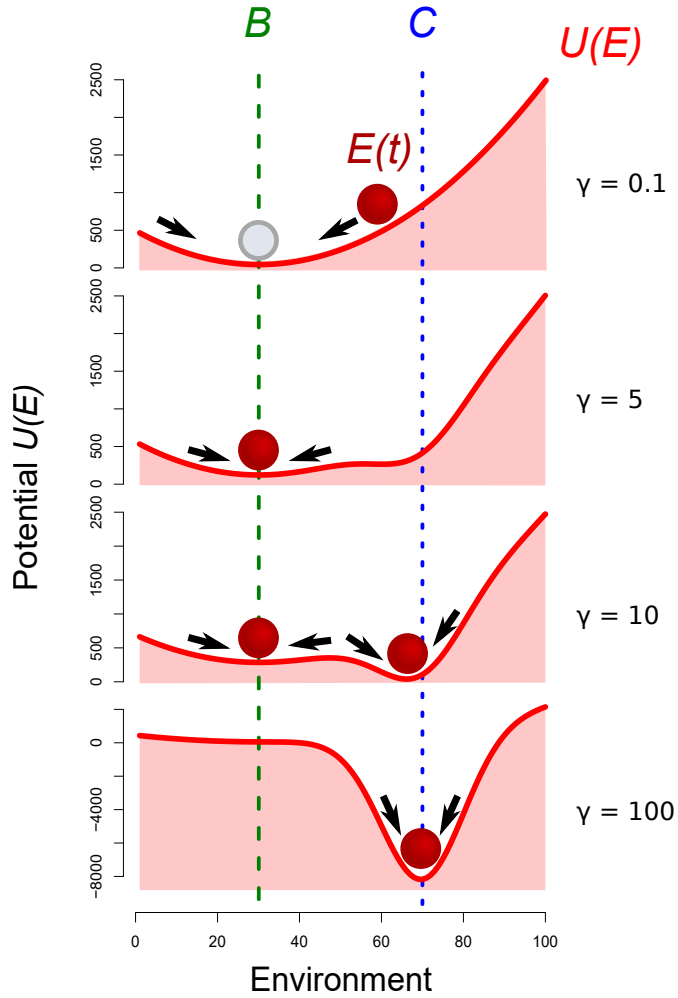

Figure 1: Representation of the environment as a potential under the action of physical processes and an ecosystem engineer. The ball representing the environmental state  $E(t)$  follows the arrows down the slope until it reaches an equilibrium value, corresponding to a minimum of the potential function  $U(E)$  (denoted by the solid curve).  $B$  is the baseline environment value, and  $C$  is the species' environmental optimum. Four parameter conditions are depicted, from weak engineering ( $\gamma = 0.1$ ) to strong engineering ( $\gamma = 100$ ).

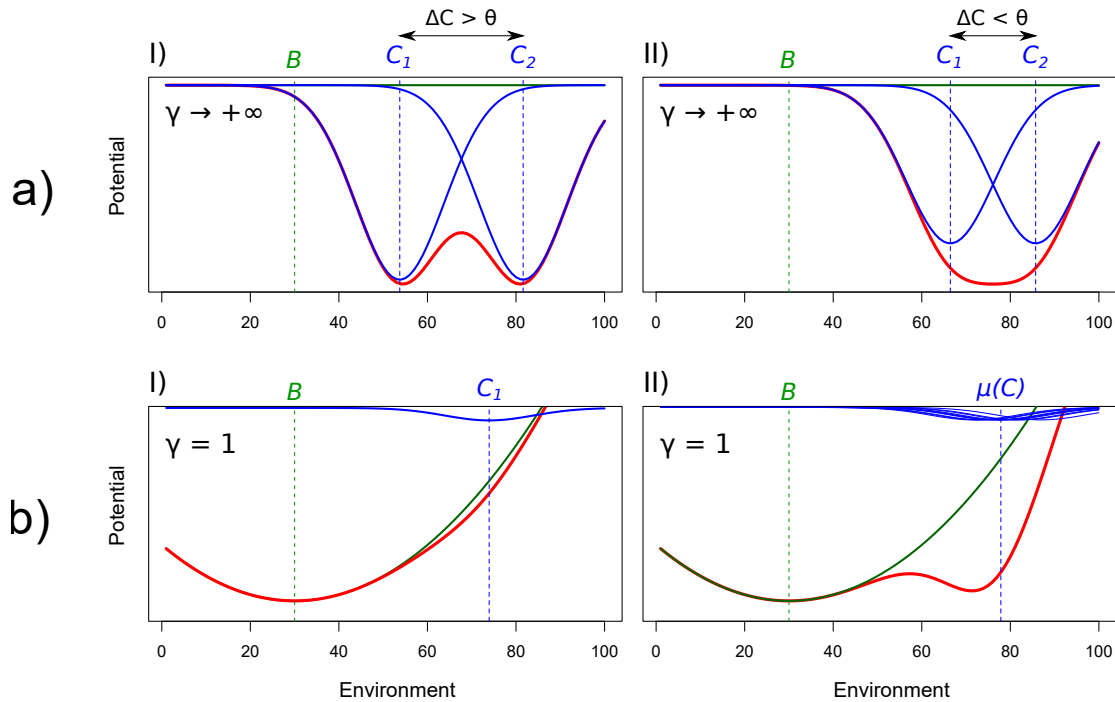

Figure 2: Influence of the similarity in species' environmental optima ( $\Delta C$ ) and diversity ( $S$ ) on the potential landscape. Blue and green curves show the contributions of species ( $U_{sp}(E)$ ) and environment ( $U_E(E)$ ), respectively, to the potential  $U(E)$  (red curve). a) : Influence of strong ecosystem engineers ( $\gamma = +\infty$ ) on the potential landscape for two values of optimum similarity  $\Delta C$ .  $\theta$  represents the threshold in  $\Delta C$  that separates cases in which species' contribution to the potential ( $U_{sp}(E)$ ) show one or two minima. b) : Influence of diversity in engineering species on the potential landscape for two levels of diversity :  $S = 1$  (I) and  $S = 10$  (II), for low niche construction strength ( $\gamma = 1$ ).

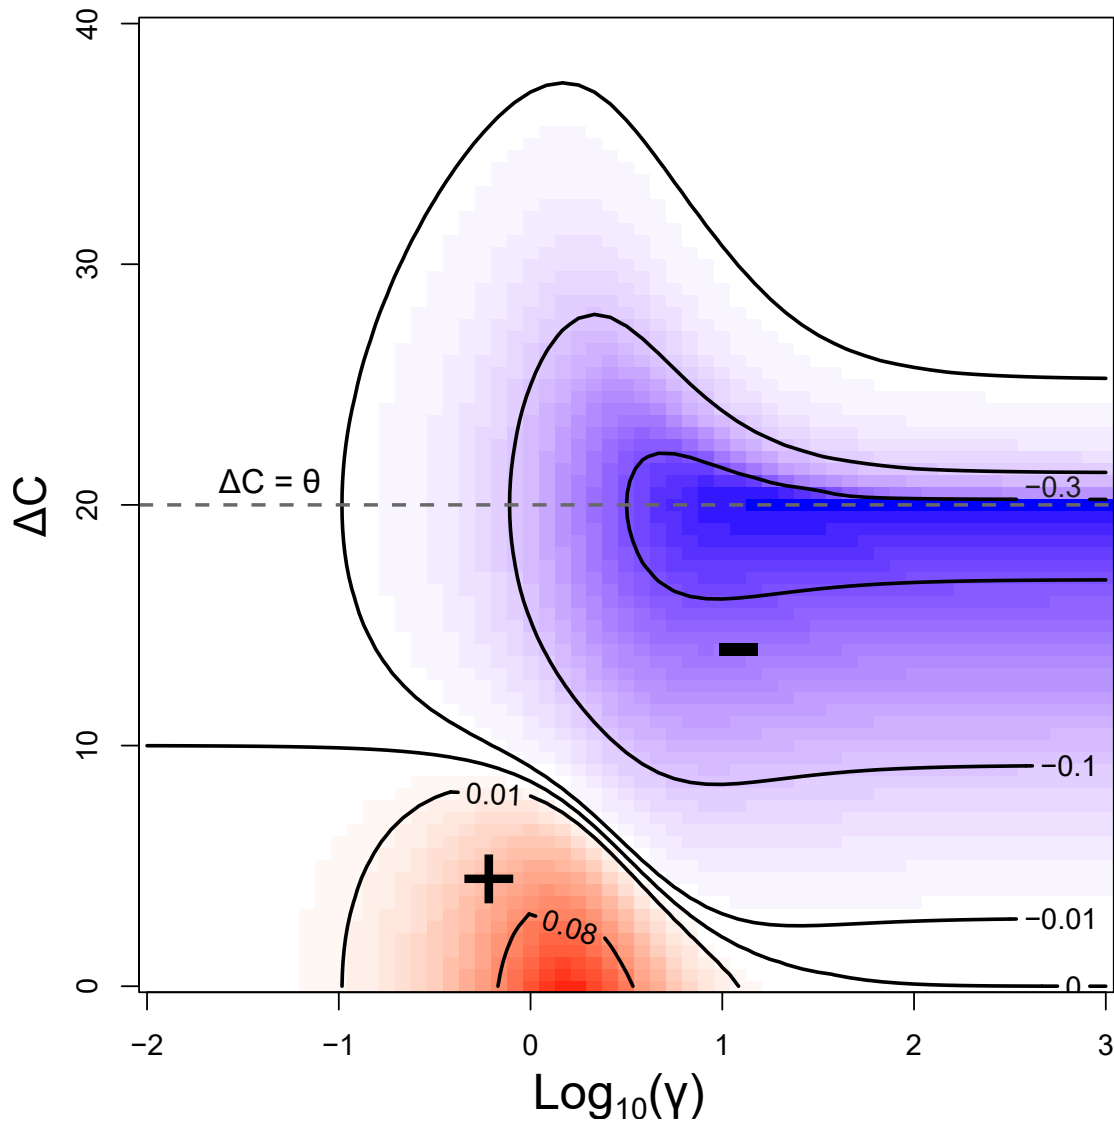

Figure 3: Emerging net species interactions as a function of the similarity of species' environment optima ( $\Delta C$ ), and niche construction strength ( $\gamma$ ). Parameter values for which net competitive interactions (-) are observed are depicted in blue, whereas net mutualistic interactions (+) are depicted in red. Interaction strength is measured by the relative change in the abundance of species 1 when associated with species 2, compared with its abundance when alone (Eq. 10). **Dashed line**  $\Delta C = \theta$  represents the threshold in environment optimum similarity that separates cases in which species' contribution to the potential shows one or two minima. In the case where bistability is observed, we only study the equilibrium for which species 1 predominates ( $C_1 = 10$ ,  $C_2 = C_1 + \Delta C$ ,  $E_{t=0} = B = 50$ ).

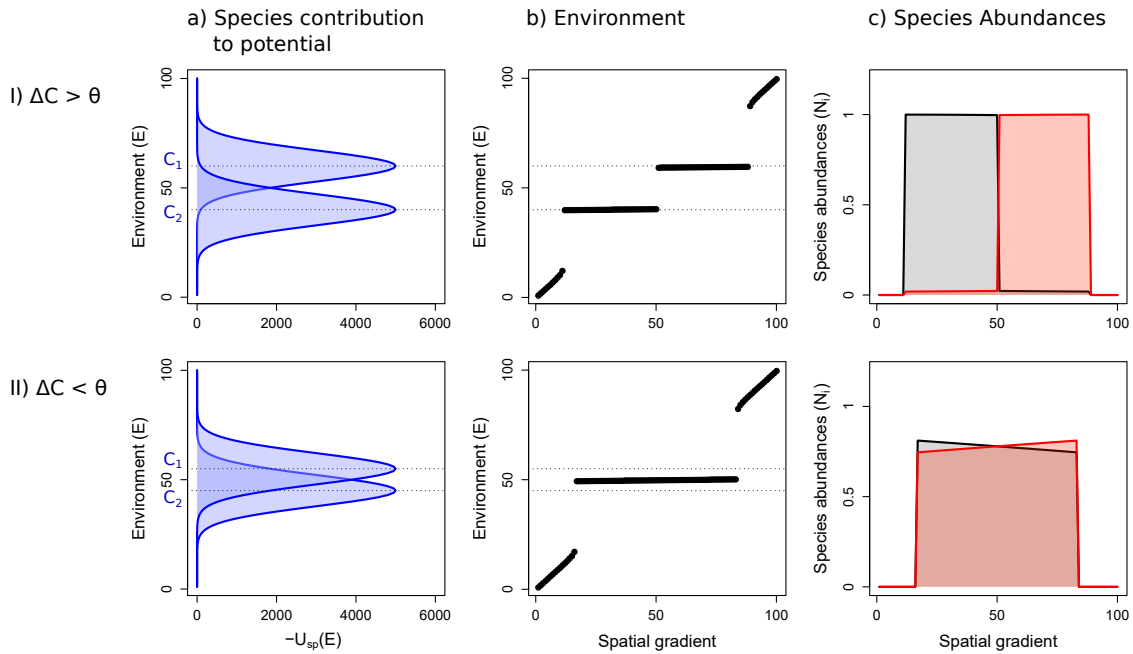

Figure 4: Influence of the similarity in ecosystem engineers on species distributions and the environment along a spatial gradient. We show results for : I) a difference in species' environmental optima  $\Delta C$  larger than the threshold  $\theta$ , II) a difference in species' environmental optima  $\Delta C$  smaller than the threshold  $\theta$ . (a) : Species contribution -  $U_{sp}(E)$  - to the potential  $U(E)$ . (b) : Value of the environment along the spatial gradient . (c) : Species abundances along the spatial gradient at equilibrium. In the two depicted cases, species are strong ecosystem engineers ( $\gamma = 10$ ).

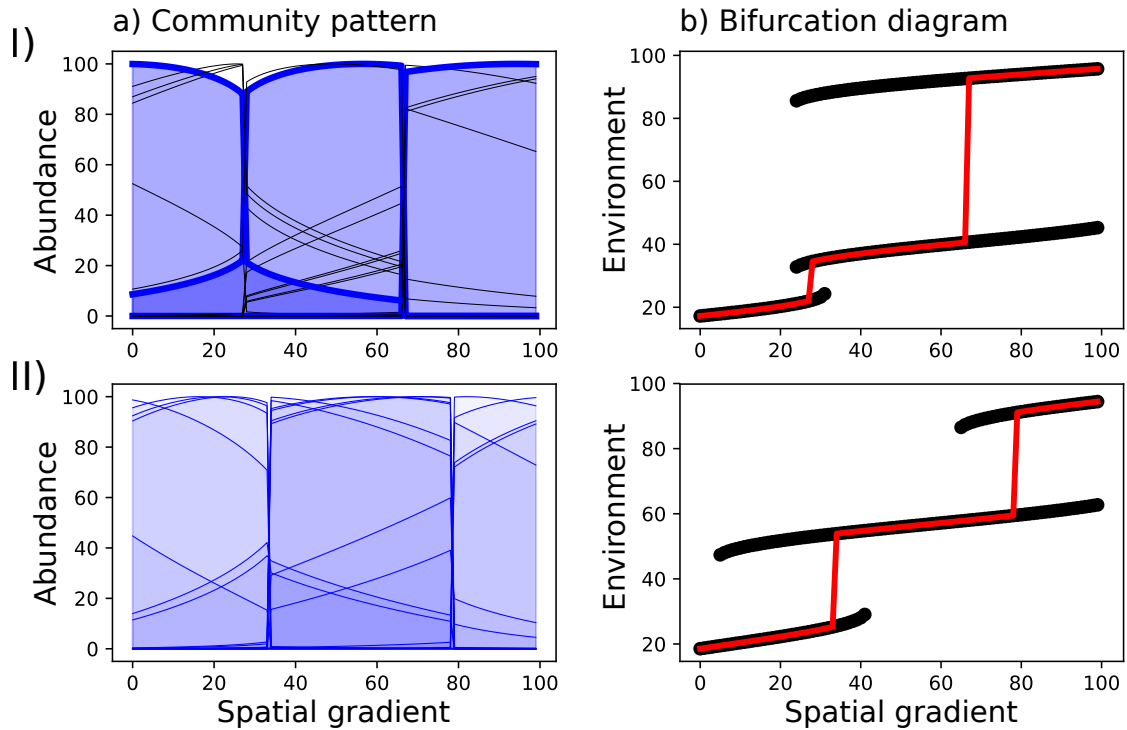

Figure 5: Species abundances along a spatial gradient (a) and bifurcation diagrams (b) in the case where: I) both strong ecosystem engineers ( $\gamma = 10$ , bold blue curves) and non-engineers ( $\gamma = 0$ , black curves) are present, II) numerous weak ecosystem engineers ( $\gamma = 2$ , blue curves) are present. In bifurcation diagrams (b), black curves represent all potential stable equilibria, and red lines represent equilibria observed in depicted cases in (a). Many weak engineers create fewer zones than there are engineers, and a pattern similar to the case where there are a few strong engineers.
